# Supplementary material
Source: Research Square preprint supplement (doi:10.21203/rs.3.rs-8240952/v1)
Supplement: Supplementary file 1 [file 325ec00dd9260506741bebe2.docx]

**Supplementary Table 1** Interaction effects between individual income and EPDS scores on subsequent fertility intention (N = 689)

| **Variables** | **Estimate** | **SE** | ***p*-value** | **OR** | **95% CI for OR** | |
| --- | --- | --- | --- | --- | --- | --- |
| **Maternal characteristics** |  |  |  |  | **Lower** | **Upper** |
| Maternal age | –0.030 | 0.018 | 0.086 | 0.970 | 0.937 | 1.004 |
| Years of education | 0.004 | 0.044 | 0.923 | 1.004 | 0.921 | 1.096 |
| Employment status |  |  |  |  |  |  |
| Housewife |  |  |  | Ref. |  |  |
| Part-time | 0.356 | 0.216 | 0.099 | 1.427 | 0.935 | 2.177 |
| Full-time | 0.472 | 0.227 | 0.038 | 1.603 | 1.027 | 2.502 |
| High income | 0.239 | 0.260 | 0.357 | 1.271 | 0.763 | 2.116 |
| Annual household income index | 0.116 | 0.095 | 0.222 | 1.123 | 0.932 | 1.353 |
| Parity | –0.647 | 0.141 | <0.001 | 0.523 | 0.397 | 0.689 |
| Pregnancy intention (binary) |  |  |  |  |  |  |
| Natural/undesired situation |  |  |  | Ref. |  |  |
| Strongly desired | –0.347 | 0.178 | 0.051 | 0.707 | 0.498 | 1.002 |
| EPDS total score (25 weeks) | 0.029 | 0.023 | 0.204 | 1.029 | 0.984 | 1.076 |
| EPDS total score (36 weeks) | 0.002 | 0.025 | 0.932 | 1.002 | 0.954 | 1.053 |
| EPDS total score (5 days postpartum) | –0.035 | 0.021 | 0.107 | 0.966 | 0.926 | 1.007 |
| EPDS cutoff ≥ 13 (1 month postpartum) | –1.072 | 0.375 | 0.004 | 0.342 | 0.164 | 0.714 |
| EPDS cutoff ≥ 13 (1 month postpartum) × high income | 0.642 | 0.794 | 0.419 | 1.899 | 0.401 | 8.997 |
| **Partner characteristics** |  |  |  |  |  |  |
| Partner age | –0.064 | 0.015 | <0.001 | 0.938 | 0.911 | 0.966 |
| **Infant characteristics** |  |  |  |  |  |  |
| Sex of baby | 0.096 | 0.164 | 0.559 | 1.100 | 0.798 | 1.517 |

Note: Reference categories were as follows: employment status = housewife; pregnancy intention = natural/undesired (vs. strongly desired); EPDS at 1 month postpartum = no depression (< 13 points); individual income = low (< 4,000,000 JPY). Outcome coding: subsequent fertility intention (Yes = 1, Considering/No = 0). Depression was defined as EPDS ≥ 13. High individual income was defined as ≥ 4,000,000 JPY. The interaction term between depression status (EPDS ≥ 13) and high income (≥ 4,000,000 JPY) was included to examine whether the effect of depression on subsequent fertility intention differed by income level. EPDS, Edinburgh Postnatal Depression Scale; JPY, Japanese yen
