# Supplementary material
Source: Research Square preprint supplement (doi:10.21203/rs.3.rs-8240952/v1)
Supplement: Supplementary file 2 [file 9e232bc3e2028be136ff12eb.docx]

**Supplementary Table 2.** Analysis of missing data: comparing demographic and psychological profiles of participants with complete and incomplete data

| Characteristic | Final analysis (n=689) | Missing data  (n=81) | p-value |
| --- | --- | --- | --- |
| Maternal age (years, mean ± SD) | 32.8 ± 4.7 | 32.7 ± 5.2 | 0.931 |
| Years of education (mean ± SD) | 15.1 ± 2.0 | 14.7 ± 2.1 | 0.136 |
| Employment status, n (%) |  |  | 0.938 |
| Housewife | 302 (44%) | 25 (41.7%) |  |
| Full-time | 259 (38%) | 23 (38.3%) |  |
| Part-time | 128 (19%) | 12 (20.0%) |  |
| Annual individual income (million JPY, n (%)) |  |  | 0.375 |
| < 1 | 306 (44%) | 26 (49.1%) |  |
| 1–2 | 80 (12%) | 9 (17.0%) |  |
| 2–4 | 165 (24%) | 8 (15.1%) |  |
| ≥ 4 | 138 (20%) | 10 (18.9%) |  |
| Annual household income (million JPY, n (%)) |  |  | 0.350 |
| < 2 | 7 (1.0%) | 2 (3.6%) |  |
| 2–4 | 107 (16%) | 6 (10.9%) |  |
| 4–6 | 210 (30%) | 19 (34.5%) |  |
| 6–8 | 189 (27%) | 13 (23.6%) |  |
| ≥ 8 | 176 (26%) | 15 (27.3%) |  |
| Pregnancy intention, n (%) |  |  | 0.011 |
| Undesired situation | 9 (1.3%) | 4 (6.3%) |  |
| Natural | 235 (34%) | 26 (41.3%) |  |
| Strongly desired | 445 (65%) | 33 (52.4%) |  |
| EPDS total score at 25 weeks (median [IQR]) | 4.0 [2.0–7.0] | 5.0 [3.0–8.0] | 0.035 |
| EPDS total score at 36 weeks (median [IQR]) | 3.0 [1.0–7.0] | 4.0 [2.0–7.5] | 0.262 |
| EPDS total score (5 days postpartum, median [IQR]) | 4.0 [1.0–8.0] | 4.0 [2.0–8.0] | 0.656 |
| EPDS total score (1 month postpartum, median [IQR]) | 4.0 [1.0–8.0] | 4.0 [1.0–7.8] | 0.957 |
| Sex of baby, n (%) |  |  | 0.718 |
| Male | 350 (51%) | 33 (54.1%) |  |
| Female | 339 (49%) | 28 (45.9%) |  |
| Partner age (years, mean ± SD) | 35.3 ± 5.8 | 35.5 ± 6.2 | 0.703 |
| Subsequent fertility intention, n (%) |  |  | 0.957 |
| No | 167 (24%) | 16 (25.0%) |  |
| Considering | 195 (28%) | 17 (26.6%) |  |
| Yes | 327 (47%) | 31 (48.4%) |  |

EPDS, Edinburgh Postnatal Depression Scale; IQR, Interquartile range; SD, Standard deviation; JPY, Japanese yen

Continuous variables are presented as mean ± standard deviation (SD) or median [interquartile range (IQR)]. Categorical variables are shown as n (%). To compare characteristics between the final analysis group and the missing data group, Welch's t-test was used for normally distributed continuous variables (maternal age, partner's age, and years of education), while the Mann-Whitney U test was applied for the Edinburgh Postnatal Depression Scale (EPDS) scores, which were not normally distributed. For categorical variables, Pearson's chi-squared test or Fisher's exact test was used as appropriate. A p-value of < 0.05 was considered statistically significant.
